# Supplementary material for: Four alkali metal molybdates with two types of Mo–O chains, ABMo3O10 (A = Li, B = Rb; A = Li, Na, K, B = Cs): synthesis, structure comparison and optical properties
Source: Royal Society of Chemistry journal article supplement (doi:10.1039/c8nj01893f), 2018-01-01

## Electronic Supplementary Information

### Four Alkali Metal Molybdates with Two Types of Mo-O Chains, $ABMo_3O_{10}$ (A = Li, B = Rb; A = Li, Na, K, B = Cs): Synthesis, Structure Comparison and Optical Properties

Shujuan Han,<sup>a</sup> Bingbing Zhang,<sup>a</sup> Tinghao Tong,<sup>a,b</sup> Zhihua Yang<sup>\*a</sup> and Shilie Pan<sup>\*a</sup>

<sup>a</sup>CAS Key Laboratory of Functional Materials and Devices for Special Environments, Xinjiang Technical Institute of Physics & Chemistry, CAS; Xinjiang Key Laboratory of Electronic Information Materials and Devices, 40-1 South Beijing Road, Urumqi 830011, China

<sup>b</sup>University of Chinese Academy of Sciences, Beijing 100049, China

**Table S1.** Atomic coordinates ( $\times 10^4$ ) and equivalent isotropic displacement parameters ( $\text{\AA}^2 \times 10^3$ ) for  $\text{LiRbMo}_3\text{O}_{10}$  and  $\text{LiCsMo}_3\text{O}_{10}$ .  $U_{(\text{eq})}$  is defined as one third of the trace of the orthogonalized  $U_{ij}$  tensor.

| atoms                          | x        | y       | z        | $U_{(\text{eq})}$ |
|--------------------------------|----------|---------|----------|-------------------|
| $\text{LiRbMo}_3\text{O}_{10}$ |          |         |          |                   |
| Li(1)                          | 514(17)  | 2500    | 1599(8)  | 36(3)             |
| Rb(1)                          | 3947(1)  | -2500   | 4024(1)  | 26(1)             |
| Mo(1)                          | 1774(1)  | 2500    | 4047(1)  | 9(1)              |
| Mo(2)                          | -1307(1) | -11(1)  | 3972(1)  | 9(1)              |
| O(1)                           | 1178(3)  | 119(3)  | 4367(2)  | 9(1)              |
| O(2)                           | -807(5)  | 2500    | 4114(3)  | 10(1)             |
| O(3)                           | -1299(5) | -2500   | 4325(3)  | 10(1)             |
| O(4)                           | 3759(5)  | 2500    | 4282(3)  | 16(1)             |
| O(5)                           | 1627(5)  | 2500    | 2800(3)  | 16(1)             |
| O(6)                           | -3275(3) | 401(4)  | 4040(2)  | 17(1)             |
| O(7)                           | -932(3)  | -299(4) | 2760(2)  | 19(1)             |
| $\text{LiCsMo}_3\text{O}_{10}$ |          |         |          |                   |
| Li(1)                          | 541(12)  | 2500    | 1603(8)  | 29(3)             |
| Cs(1)                          | 6000(1)  | 2500    | 6014(1)  | 21(1)             |
| Mo(1)                          | 1744(1)  | 2500    | 4049(1)  | 9(1)              |
| Mo(2)                          | 1319(1)  | -1(1)   | 5991(1)  | 9(1)              |
| O(1)                           | 1170(3)  | 127(3)  | 4386(2)  | 11(1)             |
| O(2)                           | 1355(4)  | 2500    | 5660(3)  | 13(1)             |
| O(3)                           | 796(4)   | -2500   | 5837(3)  | 11(1)             |
| O(4)                           | 1536(4)  | 2500    | 2829(3)  | 16(1)             |
| O(5)                           | 3720(4)  | 2500    | 4224(3)  | 17(1)             |
| O(6)                           | 3270(3)  | -444(4) | 5964(2)  | 17(1)             |
| O(7)                           | 899(3)   | 258(4)  | 7172(2)  | 20(1)             |
| $\text{NaCsMo}_3\text{O}_{10}$ |          |         |          |                   |
| Na(1)                          | 574(4)   | 2500    | 2780(2)  | 21(1)             |
| Cs(1)                          | 1446(1)  | 2500    | 6489(1)  | 22(1)             |
| Mo(1)                          | -2671(1) | 2500    | 4434(1)  | 10(1)             |
| Mo(2)                          | 6095(1)  | -12(1)  | 6006(1)  | 10(1)             |
| O(1)                           | -3844(6) | 2500    | 5743(3)  | 12(1)             |
| O(2)                           | -3466(4) | 138(4)  | 4642(2)  | 12(1)             |
| O(3)                           | 8189(4)  | -329(5) | 6299(2)  | 19(1)             |
| O(4)                           | 5038(5)  | 289(4)  | 6959(2)  | 20(1)             |
| O(5)                           | 5572(6)  | -2500   | 5858(3)  | 13(1)             |
| O(6)                           | -689(6)  | 2500    | 4883(3)  | 18(1)             |
| O(7)                           | -2292(6) | 2500    | 3334(3)  | 17(1)             |
| $\text{KCsMo}_3\text{O}_{10}$  |          |         |          |                   |
| K(1)                           | -8456(3) | 4782(3) | -2758(3) | 22(1)             |

---

|       |           |           |          |       |
|-------|-----------|-----------|----------|-------|
| Cs(1) | -3100(1)  | 2695(1)   | -864(1)  | 26(1) |
| Mo(1) | -337(1)   | -685(1)   | 3555(1)  | 12(1) |
| Mo(2) | 4497(1)   | -1986(1)  | 5355(1)  | 13(1) |
| Mo(3) | 2278(1)   | 1648(1)   | 1902(1)  | 13(1) |
| O(1)  | 4049(9)   | 1000(9)   | 3681(9)  | 12(1) |
| O(2)  | 257(9)    | 1541(9)   | 3993(9)  | 12(1) |
| O(3)  | 2627(9)   | -1315(10) | 3878(10) | 15(2) |
| O(4)  | 464(10)   | 959(10)   | 1319(9)  | 16(2) |
| O(5)  | 4155(10)  | -3751(10) | 7303(10) | 23(2) |
| O(6)  | 112(10)   | -2756(11) | 3350(10) | 21(2) |
| O(7)  | 1625(10)  | 3989(11)  | 1169(11) | 24(2) |
| O(8)  | -2449(10) | 266(11)   | 3093(10) | 24(2) |
| O(9)  | -3537(11) | -1430(12) | -259(11) | 25(2) |
| O(10) | 6007(10)  | -3080(12) | 4397(13) | 30(2) |

---

**Table S2.** Selected bond lengths (Å) and angles (deg.) for LiRbMo<sub>3</sub>O<sub>10</sub>.

|                   |            |                       |            |
|-------------------|------------|-----------------------|------------|
| Li(1)-O(5)        | 1.888(13)  | Mo(1)-O(5)            | 1.699(4)   |
| Li(1)-O(4)#12     | 1.916(14)  | Mo(1)-O(4)            | 1.724(4)   |
| Li(1)-O(6)#13     | 2.082(9)   | Mo(1)-O(1)#1          | 1.918(3)   |
| Li(1)-O(6)#3      | 2.082(9)   | Mo(1)-O(1)            | 1.918(3)   |
| Rb(1)-O(7)#5      | 2.940(3)   | Mo(1)-O(2)            | 2.203(4)   |
| Rb(1)-O(6)#2      | 3.123(4)   | Mo(1)-O(3)#2          | 2.247(4)   |
| Rb(1)-O(6)#8      | 3.123(4)   | Mo(2)-O(7)            | 1.691(3)   |
| Rb(1)-O(6)#9      | 3.228(4)   | Mo(2)-O(6)            | 1.711(3)   |
| Rb(1)-O(6)#10     | 3.228(4)   | Mo(2)-O(3)            | 1.9400(19) |
| Rb(1)-O(7)#3      | 2.940(3)   | Mo(2)-O(2)            | 1.9529(19) |
| Rb(1)-O(4)#6      | 3.021(5)   | Mo(2)-O(1)            | 2.189(3)   |
| Rb(1)-O(1)#7      | 3.116(3)   | Mo(2)-O(1)#2          | 2.260(3)   |
| Rb(1)-O(1)        | 3.116(3)   |                       |            |
| O(4)-Mo(1)-O(1)   | 102.63(9)  | O(7)#5-Rb(1)-O(1)     | 120.57(8)  |
| O(1)#1-Mo(1)-O(1) | 139.24(17) | O(7)#3-Rb(1)-O(1)     | 77.93(8)   |
| O(5)-Mo(1)-O(2)   | 88.11(17)  | O(7)#3-Rb(1)-O(6)#8   | 170.82(8)  |
| O(4)-Mo(1)-O(2)   | 167.00(17) | O(1)#7-Rb(1)-O(1)     | 78.80(12)  |
| O(1)#1-Mo(1)-O(2) | 74.10(9)   | O(7)#5-Rb(1)-O(6)#2   | 170.82(8)  |
| O(6)-Mo(2)-O(1)   | 158.38(12) | O(5)-Li(1)-O(6)#13    | 96.4(5)    |
| O(3)-Mo(2)-O(1)   | 88.83(13)  | O(4)#12-Li(1)-O(6)#13 | 97.3(4)    |
| O(2)-Mo(2)-O(1)   | 73.79(13)  | O(5)-Li(1)-O(6)#3     | 96.4(5)    |
| O(7)-Mo(2)-O(1)#2 | 163.31(12) | O(4)#12-Li(1)-O(6)#3  | 97.3(4)    |
| O(6)-Mo(2)-O(1)#2 | 90.01(12)  | O(6)#13-Li(1)-O(6)#3  | 99.2(6)    |

Symmetry transformations used to generate equivalent atoms:

#1  $x, -y+1/2, z$  #2  $-x, -y, -z+1$  #3  $x+1/2, y, -z+1/2$  #4  $x, y+1, z$

#5  $x+1/2, -y-1/2, -z+1/2$  #6  $-x+1, -y, -z+1$  #7  $x, -y-1/2, z$  #8  $-x, y-1/2, -z+1$

#9  $x+1, y, z$  #10  $x+1, -y-1/2, z$  #11  $-x+1/2, -y, z+1/2$  #12  $x-1/2, y, -z+1/2$

#13  $x+1/2, -y+1/2, -z+1/2$  #14  $-x+1/2, -y, z-1/2$  #15  $x-1/2, y+1, -z+1/2$  #16  $x-1, y, z$

**Table S3.** Selected bond lengths (Å) and angles (deg.) for LiCsMo<sub>3</sub>O<sub>10</sub>.

|                     |           |                        |            |
|---------------------|-----------|------------------------|------------|
| Li(1)-O(4)          | 1.909(11) | Mo(1)-O(4)             | 1.705(4)   |
| Li(1)-O(5)#1        | 1.950(11) | Mo(1)-O(5)             | 1.727(4)   |
| Li(1)-O(6)#2        | 2.066(8)  | Mo(1)-O(1)             | 1.922(2)   |
| Li(1)-O(6)#3        | 2.066(8)  | Mo(1)-O(1)#9           | 1.922(2)   |
| Cs(1)-O(7)#5        | 3.040(3)  | Mo(1)-O(3)#11          | 2.203(4)   |
| Cs(1)-O(7)#6        | 3.040(3)  | Mo(1)-O(2)             | 2.264(4)   |
| Cs(1)-O(5)          | 3.174(4)  | Mo(2)-O(7)             | 1.693(3)   |
| Cs(1)-O(1)#7        | 3.203(2)  | Mo(2)-O(6)             | 1.721(3)   |
| Cs(1)-O(1)#8        | 3.203(2)  | Mo(2)-O(2)             | 1.9482(11) |
| Cs(1)-O(6)#8        | 3.220(3)  | Mo(2)-O(3)             | 1.9567(11) |
| Cs(1)-O(6)#7        | 3.220(3)  | Mo(2)-O(1)#11          | 2.218(3)   |
| Cs(1)-O(6)          | 3.248(3)  | Mo(2)-O(1)             | 2.235(3)   |
| Cs(1)-O(6)#9        | 3.248(3)  |                        |            |
| O(4)-Li(1)-O(5)#1   | 152.9(6)  | O(5)-Mo(1)-O(1)        | 102.80(8)  |
| O(4)-Li(1)-O(6)#2   | 99.1(4)   | O(4)-Mo(1)-O(1)#9      | 102.45(9)  |
| O(5)#1-Li(1)-O(6)#2 | 98.6(4)   | O(4)-Mo(1)-<br>O(3)#11 | 88.09(16)  |
| O(4)-Li(1)-O(6)#3   | 99.1(4)   | O(1)-Mo(1)-O(2)        | 73.75(8)   |
| O(5)#1-Li(1)-O(6)#3 | 98.6(4)   | O(3)#11-Mo(1)-<br>O(2) | 77.33(14)  |
| O(6)#2-Li(1)-O(6)#3 | 97.7(5)   | O(7)-Mo(2)-O(6)        | 104.73(13) |
| O(7)#5-Cs(1)-O(7)#6 | 67.86(11) | O(7)-Mo(2)-O(2)        | 96.89(14)  |
| O(7)#6-Cs(1)-O(5)   | 129.17(7) | O(2)-Mo(2)-O(3)        | 156.52(16) |
| O(7)#5-Cs(1)-O(1)#7 | 79.60(7)  | O(7)-Mo(2)-<br>O(1)#11 | 91.49(12)  |
| O(7)#5-Cs(1)-O(1)#8 | 120.83(7) | O(6)-Mo(2)-<br>O(1)#11 | 159.77(11) |

Symmetry transformations used to generate equivalent atoms:

- #1  $x-1/2, y, -z+1/2$     #2  $-x+1/2, y+1/2, z-1/2$     #3  $-x+1/2, -y, z-1/2$   
#4  $-x+1/2, -y+1, z-1/2$     #5  $x+1/2, -y+1/2, -z+3/2$     #6  $x+1/2, y, -z+3/2$   
#7  $-x+1, y+1/2, -z+1$     #8  $-x+1, -y, -z+1$     #9  $x, -y+1/2, z$   
#10  $x+1/2, y, -z+1/2$     #11  $-x, -y, -z+1$     #12  $-x+1, -y+1, -z+1$   
#13  $x, -y-1/2, z$     #14  $-x+1/2, -y, z+1/2$     #15  $x-1/2, y, -z+3/2$

**Table S4.** Selected bond lengths (Å) and angles (deg.) for NaCsMo<sub>3</sub>O<sub>10</sub>.

|                      |            |                    |            |
|----------------------|------------|--------------------|------------|
| Na(1)-O(7)           | 2.384(5)   | Cs(1)-O(4)#12      | 3.334(4)   |
| Na(1)-O(3)#1         | 2.390(4)   | Mo(1)-O(6)         | 1.688(5)   |
| Na(1)-O(3)#2         | 2.390(4)   | Mo(1)-O(7)         | 1.739(5)   |
| Na(1)-O(7)#3         | 2.399(6)   | Mo(1)-O(2)#12      | 1.928(3)   |
| Na(1)-O(4)#4         | 2.524(4)   | Mo(1)-O(2)         | 1.928(3)   |
| Na(1)-O(4)#5         | 2.524(4)   | Mo(1)-O(1)         | 2.237(5)   |
| Cs(1)-O(6)           | 3.004(5)   | Mo(1)-O(5)#6       | 2.294(5)   |
| Cs(1)-O(2)#6         | 3.097(3)   | Mo(2)-O(3)         | 1.703(3)   |
| Cs(1)-O(2)#7         | 3.097(3)   | Mo(2)-O(4)         | 1.712(4)   |
| Cs(1)-O(4)#8         | 3.144(4)   | Mo(2)-O(5)         | 1.9503(16) |
| Cs(1)-O(4)#9         | 3.144(4)   | Mo(2)-O(1)#15      | 1.9562(15) |
| Cs(1)-O(3)#10        | 3.331(4)   | Mo(2)-O(2)#15      | 2.158(3)   |
| Cs(1)-O(3)#11        | 3.331(4)   | Mo(2)-O(2)#6       | 2.276(3)   |
| Cs(1)-O(4)           | 3.334(4)   |                    |            |
|                      |            |                    |            |
| O(4)#8-Cs(1)-O(3)#10 | 98.72(10)  | O(6)-Mo(1)-O(7)    | 104.8(2)   |
| O(7)-Na(1)-O(3)#2    | 98.94(15)  | O(6)-Mo(1)-O(2)#12 | 102.75(11) |
| O(3)#1-Na(1)-O(3)#2  | 87.5(2)    | O(2)#12-Mo(1)-O(2) | 137.65(18) |
| O(7)-Na(1)-O(7)#3    | 154.86(18) | O(6)-Mo(1)-O(1)    | 89.5(2)    |
| O(2)#6-Cs(1)-O(4)#8  | 163.95(9)  | O(7)-Mo(1)-O(1)    | 165.7(2)   |
| O(2)#7-Cs(1)-O(4)#8  | 105.49(9)  | O(2)#12-Mo(1)-O(1) | 73.51(10)  |
| O(6)-Cs(1)-O(4)#9    | 116.83(10) | O(3)-Mo(2)-O(4)    | 103.96(17) |
| O(2)#7-Cs(1)-O(3)#10 | 138.70(9)  | O(3)-Mo(2)-O(5)    | 95.30(17)  |
| O(4)#8-Cs(1)-O(4)#9  | 64.73(13)  | O(4)-Mo(2)-O(5)    | 97.66(18)  |
| O(6)-Cs(1)-O(3)#10   | 60.55(9)   | O(3)-Mo(2)-O(1)#15 | 99.90(18)  |
| O(2)#6-Cs(1)-O(3)#10 | 85.02(9)   | O(4)-Mo(2)-O(1)#15 | 93.57(17)  |
| O(6)-Cs(1)-O(4)      | 130.04(9)  | O(5)-Mo(2)-O(1)#15 | 158.33(19) |
| O(2)#6-Cs(1)-O(4)    | 51.40(9)   | O(3)-Mo(2)-O(2)#15 | 97.02(15)  |

Symmetry transformations used to generate equivalent atoms:

- #1 -x+1, y+1/2, -z+1 #2 -x+1, -y, -z+1 #3 x+1/2, y, -z+1/2 #4 -x+1/2, -y, z-1/2  
#5 -x+1/2, y+1/2, z-1/2 #6 -x, -y, -z+1 #7 -x, y+1/2, -z+1 #8 x-1/2, -y+1/2, -z+3/2  
#9 x-1/2, y, -z+3/2 #10 x-1, y, z #11 x-1, -y+1/2, #12 x, y+1/2, z  
#13 x-1/2, y, -z+1/2 #14 -x, -y+1, -z+1 #15 x+1, y, z #16 -x+1/2, -y, z+1/2  
#17 x+1/2, y, -z+3/2 #18 x, -y-1/2, z

**Table S5.** Selected bond lengths (Å) and angles (deg.) for KCsMo<sub>3</sub>O<sub>10</sub>.

|                     |           |                    |          |
|---------------------|-----------|--------------------|----------|
| K(1)-O(6)#1         | 2.629(8)  | Mo(1)-O(8)         | 1.691(9) |
| K(1)-O(2)#2         | 2.731(8)  | Mo(1)-O(6)         | 1.725(8) |
| K(1)-O(5)#3         | 2.739(9)  | Mo(1)-O(2)#7       | 1.852(7) |
| K(1)-O(10)#4        | 2.762(9)  | Mo(1)-O(4)         | 1.957(7) |
| K(1)-O(9)#1         | 2.948(9)  | Mo(1)-O(2)         | 2.195(7) |
| K(1)-O(7)#2         | 2.964(9)  | Mo(1)-O(3)         | 2.353(8) |
| K(1)-O(7)#5         | 3.056(10) | Mo(2)-O(10)        | 1.694(8) |
| K(1)-O(6)#3         | 3.090(9)  | Mo(2)-O(5)         | 1.706(7) |
| Cs(1)-O(5)#3        | 2.995(8)  | Mo(2)-O(3)         | 1.843(8) |
| Cs(1)-O(8)          | 3.016(9)  | Mo(2)-O(1)#9       | 1.992(7) |
| Cs(1)-O(6)#4        | 3.089(8)  | Mo(2)-O(1)         | 2.166(7) |
| Cs(1)-O(9)#1        | 3.142(9)  | Mo(3)-O(7)         | 1.680(8) |
| Cs(1)-O(3)#4        | 3.150(8)  | Mo(3)-O(9)#4       | 1.700(8) |
| Cs(1)-O(7)#6        | 3.176(9)  | Mo(3)-O(4)         | 1.891(8) |
| Cs(1)-O(4)          | 3.184(8)  | Mo(3)-O(1)         | 1.950(7) |
| Cs(1)-O(9)          | 3.319(10) | Mo(3)-O(3)         | 2.214(8) |
| Cs(1)-O(4)#4        | 3.349(8)  | Mo(3)-O(2)         | 2.307(7) |
| Cs(1)-O(5)#7        | 3.443(9)  |                    |          |
| O(6)#1-K(1)-O(2)#2  | 112.2(3)  | O(6)-Mo(1)-O(2)#7  | 101.8(3) |
| O(6)#1-K(1)-O(5)#3  | 159.1(3)  | O(8)-Mo(1)-O(4)    | 98.7(4)  |
| O(6)#1-K(1)-O(10)#4 | 79.9(3)   | O(2)#7-Mo(1)-O(4)  | 144.7(3) |
| O(6)#1-K(1)-O(9)#1  | 91.1(3)   | O(6)-Mo(1)-O(2)    | 155.7(3) |
| O(6)#1-K(1)-O(7)#2  | 84.5(3)   | O(2)#7-Mo(1)-O(2)  | 75.1(3)  |
| O(7)#2-K(1)-O(7)#5  | 60.5(3)   | O(2)#7-Mo(1)-O(3)  | 84.4(3)  |
| O(6)#1-K(1)-O(6)#3  | 76.3(3)   | O(4)-Mo(1)-O(3)    | 71.7(3)  |
| O(5)#3-Cs(1)-O(6)#4 | 108.3(2)  | O(5)-Mo(2)-O(3)    | 104.7(4) |
| O(8)-Cs(1)-O(6)#4   | 119.4(2)  | O(10)-Mo(2)-O(1)#9 | 98.9(4)  |
| O(5)#3-Cs(1)-O(9)#1 | 76.2(2)   | O(1)#9-Mo(2)-O(1)  | 71.6(3)  |
| O(9)#1-Cs(1)-O(3)#4 | 91.7(2)   | O(4)-Mo(3)-O(2)    | 71.3(3)  |
| O(5)#3-Cs(1)-O(7)#6 | 73.6(2)   | O(1)-Mo(3)-O(2)    | 90.2(3)  |
| O(7)#6-Cs(1)-O(4)   | 70.9(2)   | O(3)-Mo(3)-O(2)    | 71.6(3)  |
| O(5)#3-Cs(1)-O(9)   | 121.6(2)  | O(7)-Mo(3)-Mo(1)   | 118.7(3) |
| O(8)-Cs(1)-O(9)     | 75.4(2)   |                    |          |

Symmetry transformations used to generate equivalent atoms:

#1 -x-1, -y, -z   #2 -x-1, -y+1, -z   #3 x-1, y+1, z-1   #4 -x, -y, -z  
#5 x-1, y, z   #6 -x, -y+1, -z   #7 -x, -y, -z+1   #8 x+1, y-1, z+1  
#9 -x+1, -y, -z+1   #10 x+1, y, z

**Figure S1** (a) The arrangement of  $\text{LiO}_4$  in  $\text{LiCsMo}_3\text{O}_{10}$ ; (b) The arrangement of the  $\text{CsO}_9$  polyhedra in  $\text{LiCsMo}_3\text{O}_{10}$ .

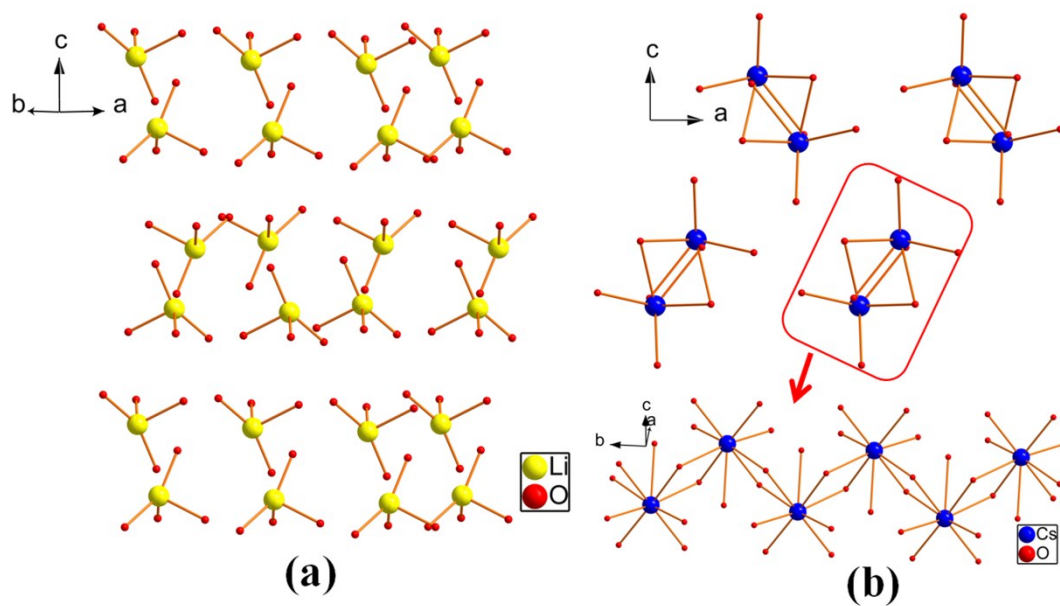



**Figure S2** (a) The arrangement of  $\text{NaO}_6$  in  $\text{NaCsMo}_3\text{O}_{10}$ ; (b) The arrangement of the  $\text{CsO}_9$  polyhedra in  $\text{NaCsMo}_3\text{O}_{10}$ .

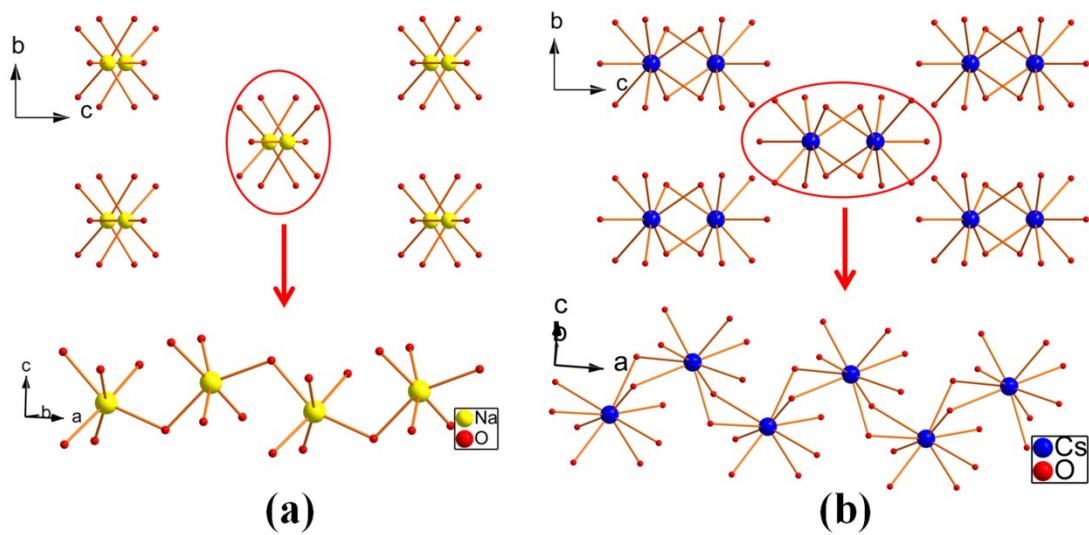

**Figure S3** (a) The arrangement of  $\text{KO}_8$  in  $\text{KC}_3\text{Mo}_3\text{O}_{10}$ ; (b) The arrangement of  $\text{CsO}_{10}$  the polyhedra in  $\text{KC}_3\text{Mo}_3\text{O}_{10}$ .

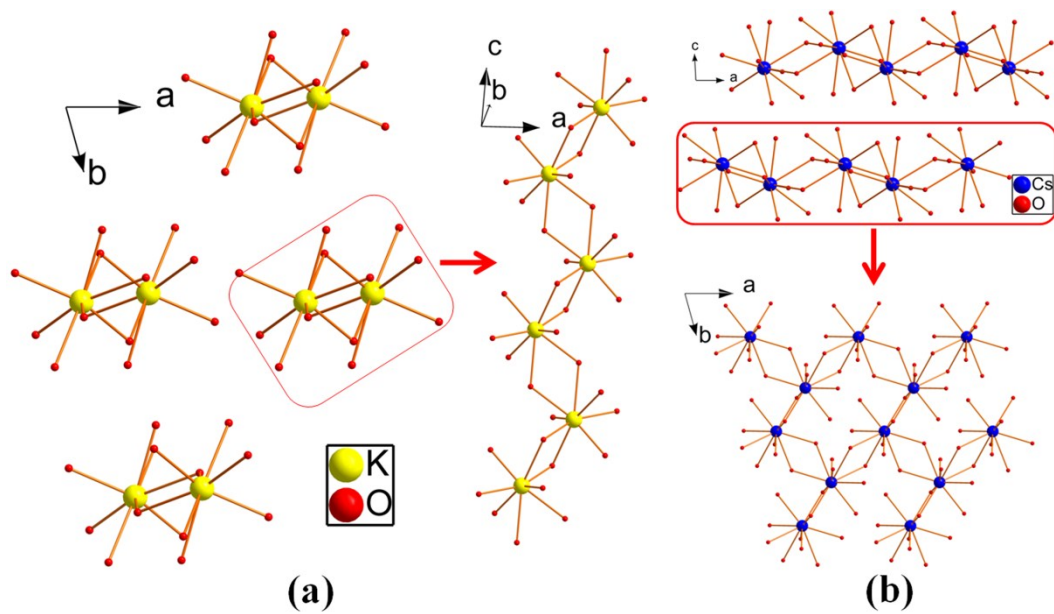

**Figure S4** (a) The Mo-O chain in  $\text{LiCsMo}_3\text{O}_{10}$ ; (b) The Mo-O chain in  $\text{NaCsMo}_3\text{O}_{10}$ ; (c) The Mo-O chain in  $\text{KCsMo}_3\text{O}_{10}$ .

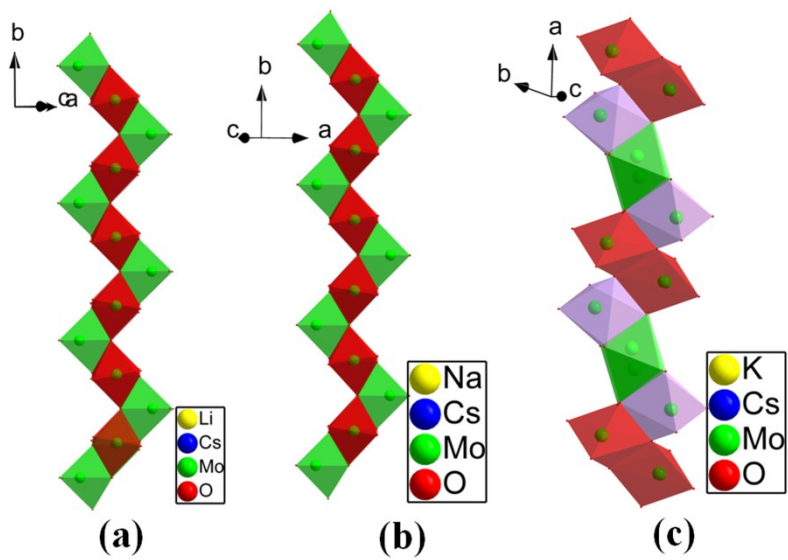

**Figure S5** The infrared spectra of  $\text{LiRbMo}_3\text{O}_{10}$ ,  $\text{LiCsMo}_3\text{O}_{10}$ ,  $\text{NaCsMo}_3\text{O}_{10}$  and  $\text{KCsMo}_3\text{O}_{10}$ .

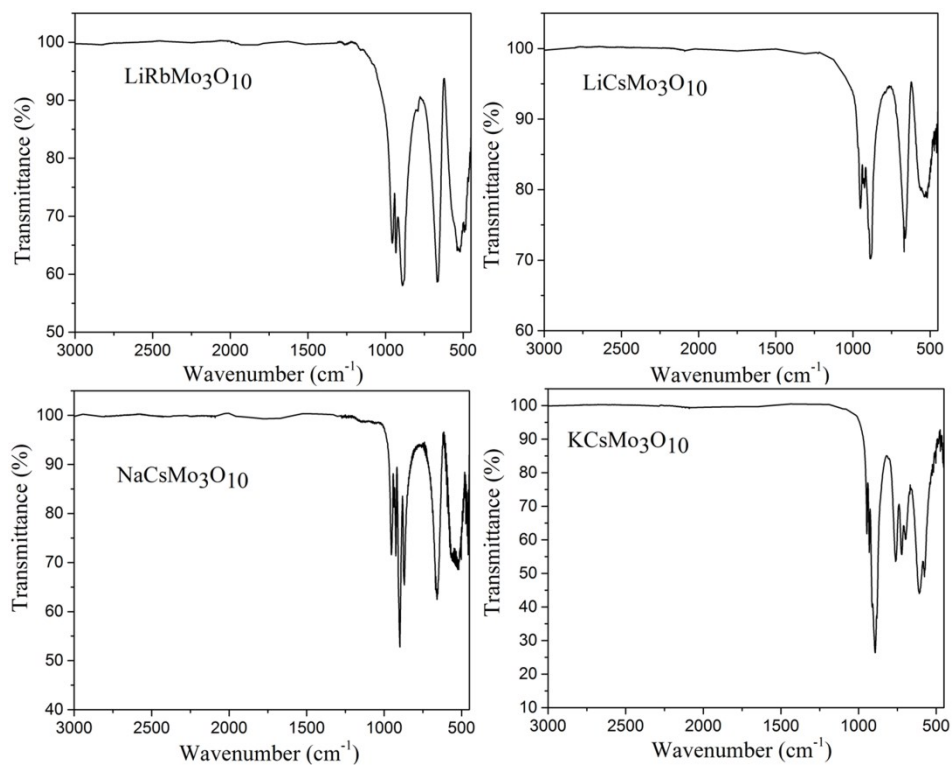

**Figure S6** The band structure (left) and projected density of states (PDOS) (right) of  $\text{LiRbMo}_3\text{O}_{10}$ .

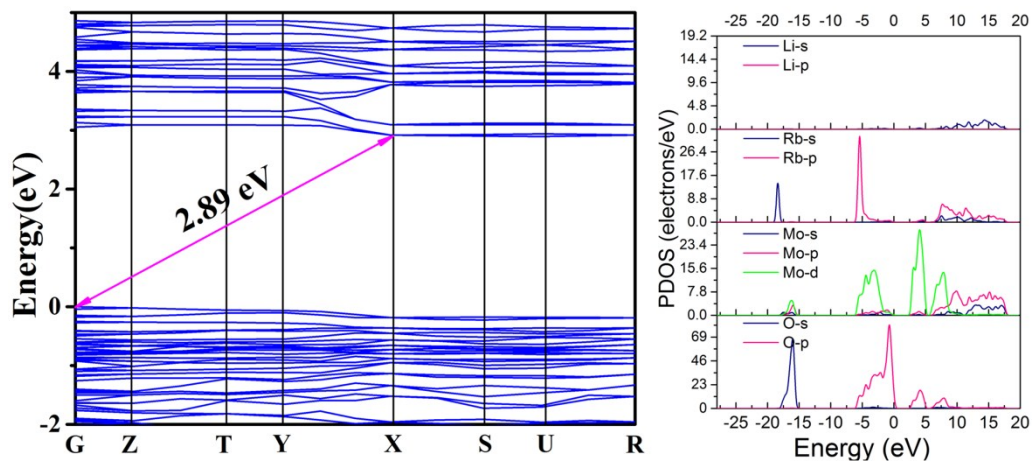

**Figure S7** The band structure (left) and projected density of states (PDOS) (right) of  $\text{LiCsMo}_3\text{O}_{10}$ .

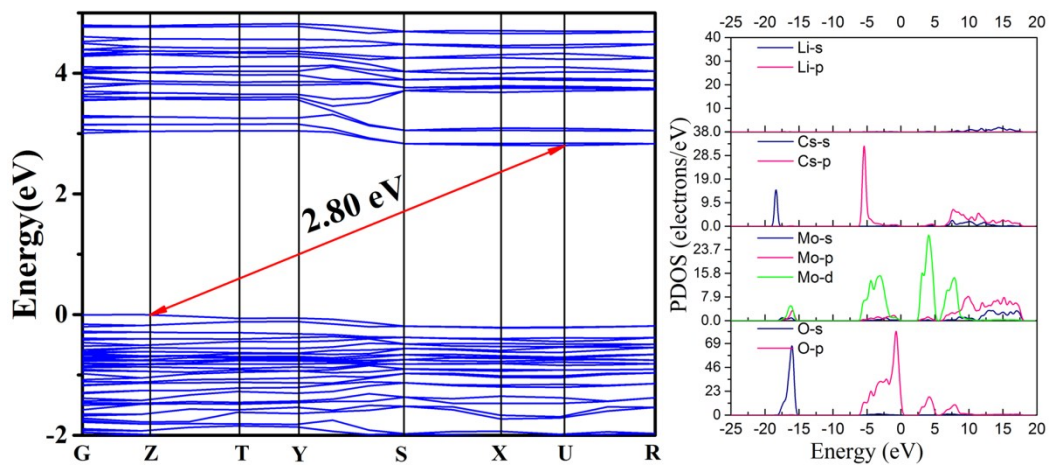

**Figure S8** The band structure (left) and projected density of states (PDOS) (right) of  $\text{NaCsMo}_3\text{O}_{10}$ .

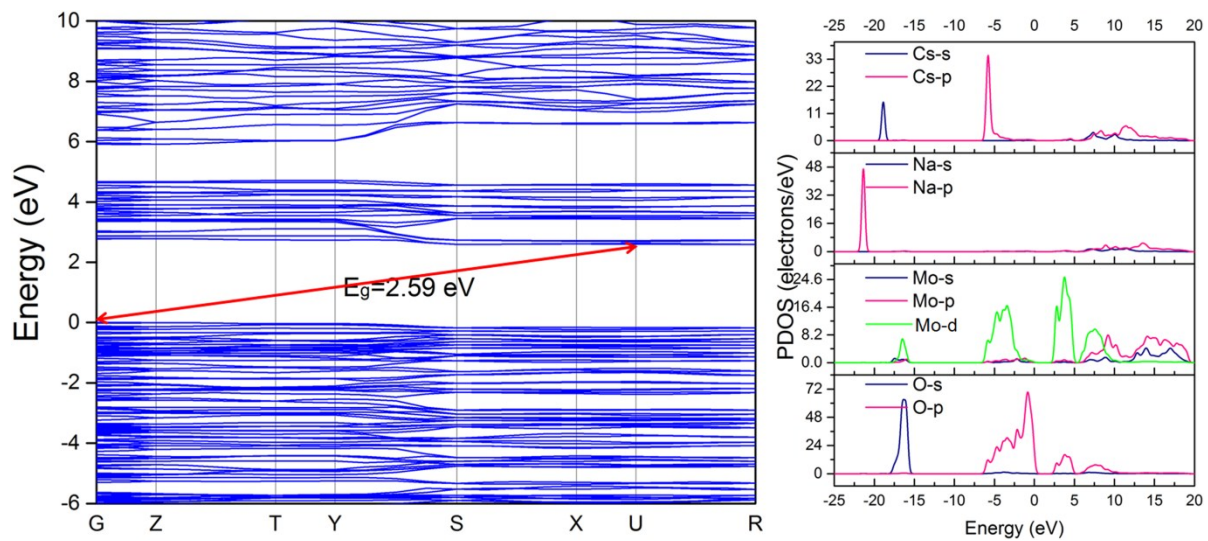

**Figure S9** The band structure (left) and projected density of states (PDOS) (right) of  $\text{KCsMo}_3\text{O}_{10}$ .

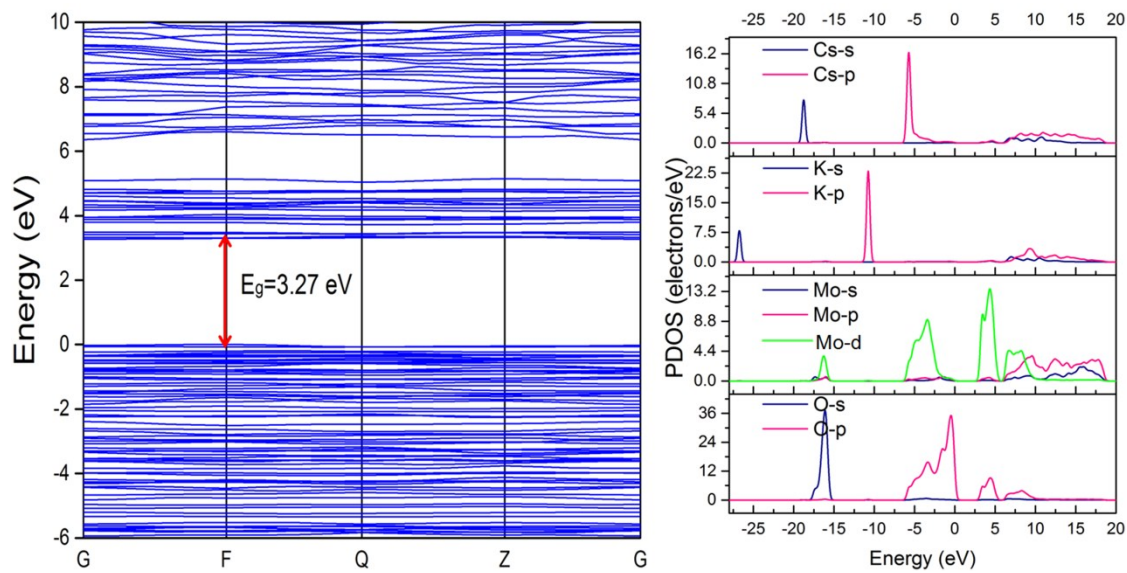

Supplement: c8nj01893f1.pdf [file c8nj01893f1.pdf]
